# Supplementary material for: Radiosensitizing Chemotherapy (Irinotecan) with Stereotactic Body Radiation Therapy for the Treatment of Inoperable Liver and/or Lung Metastases of Colorectal Cancer
Source: MDPI journal article supplement (doi:10.3390/cancers13020248), 2021-01-11
Supplement: s1 [file s1]

## **Supplementary Materials**

### **Radiosensitizing Chemotherapy (Irinotecan) with Stereotactic Body Radiation Therapy for the Treatment of Inoperable Liver and/or Lung Metastases of Colorectal Cancer**

#### **Radiotherapy protocol details**

Treatment had to start three weeks maximum after inclusion. Two planning CT minimum (at least one contrast-enhanced for the liver) were required for the delineation of the CTV. An internal target volume (ITV) was defined depending on the techniques of SBRT (Body frame, Novalis, Brain Lab, Feldkirchen, Germany or Cyberknife, Accuray, Sunnyvalley, CA). The planning target volume (PTV) was defined as ITV + 3mm minimum laterally and in the antero-posterior direction and ITV+5mm minimum in the craniocaudal direction. Repositioning was achieved by stereotactic extracranial body framework (Body Frame Elekta) with cone-beam computed tomography (CBCT) or based on the detection of fiducials that were implanted close to the target. An intensity-modulated planning system was possible depending on the proximity of the target to the organs at risk (OAR).

Table 1 : Patient and treatment characteristics for the patient lost during the follow-up.  
Synchronous = time delay with primitive diagnosis  $\leq 4$  months.

|                                                         |                                                     | Lung     |
|---------------------------------------------------------|-----------------------------------------------------|----------|
| <b>Lost to follow-up patient characteristics</b>        | <b>(1 patient)</b>                                  |          |
| Age (years)                                             |                                                     | 62.2     |
| Performans Status                                       |                                                     | Unknown  |
| Synchronous metastases with primitive diagnosis         |                                                     | No       |
| Prior chemotherapy                                      |                                                     |          |
|                                                         | Adjuvant                                            | Yes      |
|                                                         | Metastatic lines                                    | 2        |
|                                                         | Prior irinotecan                                    | No       |
| Prior metastase-directed surgery                        |                                                     |          |
|                                                         | Liver                                               | No       |
|                                                         | Lung                                                | No       |
| Time between primitive diagnosis and inclusion (months) |                                                     | 42.7     |
| Largest diameter (mm)                                   |                                                     |          |
|                                                         | Target 1                                            | 5        |
|                                                         | Target 2                                            | 6        |
| Treatment characteristics                               |                                                     |          |
| Number of lesions                                       |                                                     | 2        |
|                                                         | PTV volume (cm <sup>3</sup> ) (Target 1 – Target 2) | 8.3-10.3 |
|                                                         | Surfacic isodose 4x10 Gy                            | Yes      |
|                                                         | Fiducials                                           | No       |
|                                                         | Respiratory monitoring                              | Yes      |

Table 2 : QLQ-C30 score differences (minimum ; first quartile ; median ; third quartile ; maximum) between baseline and 9-month. Mean values  $\pm$  standard deviation are given at inclusion and 9-month.

| Variable QLQ-C30 (13 patients) | Inclusion        | 9-month         | Difference                    | P-value |
|--------------------------------|------------------|-----------------|-------------------------------|---------|
| Physical functioning           | 87.7 $\pm$ 9.3   | 87.7 $\pm$ 15.8 | (-26.6; -6.6; 0; 6.6; 26.6)   | 1.00    |
| Role functioning               | 84.6 $\pm$ 17.3  | 88.4 $\pm$ 28.3 | (-50; -16.6; 0; 0; 66.6)      | 0.37    |
| Emotional functioning          | 82.6 $\pm$ 15.2  | 86.1 $\pm$ 23.4 | (-33.3; -25; 0; 4.16; 41.6)   | 0.54    |
| Cognitive functioning          | 84.7 $\pm$ 19.4  | 80.5 $\pm$ 30   | (-16.6; 0; 0; 4.16; 33.3)     | 0.50    |
| Social functioning             | 86.1 $\pm$ 22.3  | 81.9 $\pm$ 32.1 | (-33.3; -4.16; 0; 4.16; 66.6) | 0.84    |
| Global health status           | 75 $\pm$ 16.6    | 76.4 $\pm$ 26   | (-25; -16.6; 0; 2.08; 50)     | 0.56    |
| Fatigue                        | 21.3 $\pm$ 16.6  | 25.2 $\pm$ 27.8 | (-33.3; -22.2; 0; 0; 33.3)    | 0.42    |
| Nausea/vomiting                | 1.28 $\pm$ 4.6   | 3.8 $\pm$ 9.9   | (-16.6; 0; 0; 0; 0)           | 0.50    |
| Pain                           | 28.2 $\pm$ 30.7  | 14.1 $\pm$ 28.7 | (-33.3; 0; 0; 33.3; 66.6)     | 0.06    |
| Dyspnea                        | 5.12 $\pm$ 12.5  | 10.2 $\pm$ 21   | (-66.6; 0; 0; 0; 0)           | 1.00    |
| Insomnia                       | 20.5 $\pm$ 32    | 15.4 $\pm$ 22   | (-33.3; 0; 0; 0; 100)         | 0.87    |
| Appetite loss                  | 0 $\pm$ 0        | 5.12 $\pm$ 12.5 | (-33.3; 0; 0; 0; 0)           | 0.50    |
| Constipation                   | 11.11 $\pm$ 16.4 | 13.9 $\pm$ 17.1 | (-33.3; 0; 0; 0; 33.3)        | 1.00    |
| Diarrhea                       | 5.5 $\pm$ 12.9   | 5.5 $\pm$ 12.9  | (-33.3; 0; 0; 0; 33.3)        | 1.00    |
| Financial difficulties         | 5.5 $\pm$ 12.9   | 11.1 $\pm$ 21.7 | (-66.6; 0; 0; 0; 0)           | 1.00    |
